# Supplementary material for: Elevated CXCL1 increases hepatocellular carcinoma aggressiveness and is inhibited by miRNA-200a
Source: PubMed Central journal article supplement (PMC5323138; doi:10.18632/oncotarget.11350), 2016-08-17
Supplement: oncotarget-07-65052-s001.pdf [file oncotarget-07-65052-s001.pdf]

## Elevated CXCL1 increases hepatocellular carcinoma aggressiveness and is inhibited by miRNA-200a

### Supplementary Materials

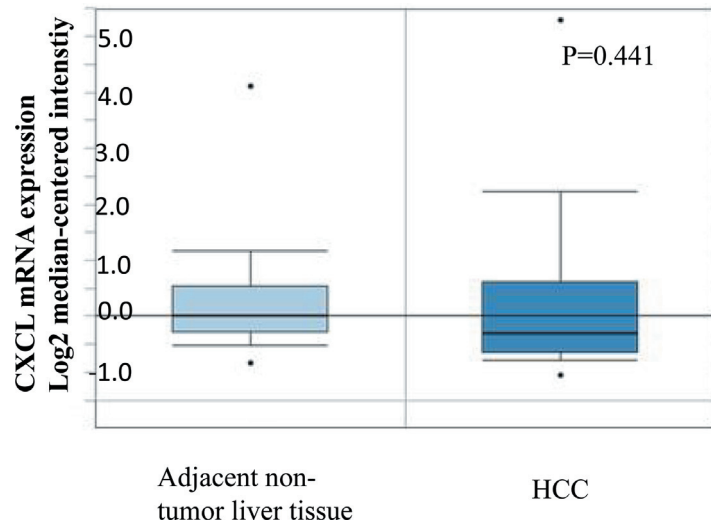

**Supplementary Figure S1: The comparison of CXCL1 mRNA expression between HCC and adjacent non-tumor tissues from 247 HCC patients, were obtained from the microarray database (www.Oncomine.org) which was conducted by Rossler.** Reply: This graph was cited from the public dataset (www.Oncomine.org), which is free to the public. But if we want to export the original graph of this data, subscription edition of Oncomine is required. In our institution, we do not subscribed this edition.

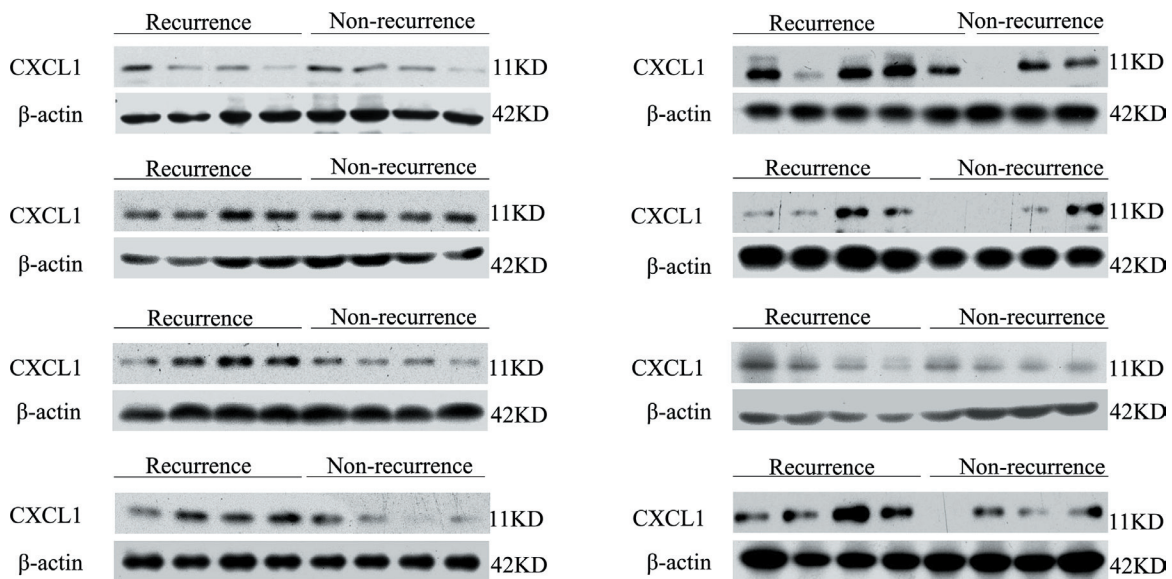

**Supplementary Figure S2: CXCL1 expression in patients with or without recurrence (33 vs 31) in 3 years after hepatectomy, which was tested by western blot.**

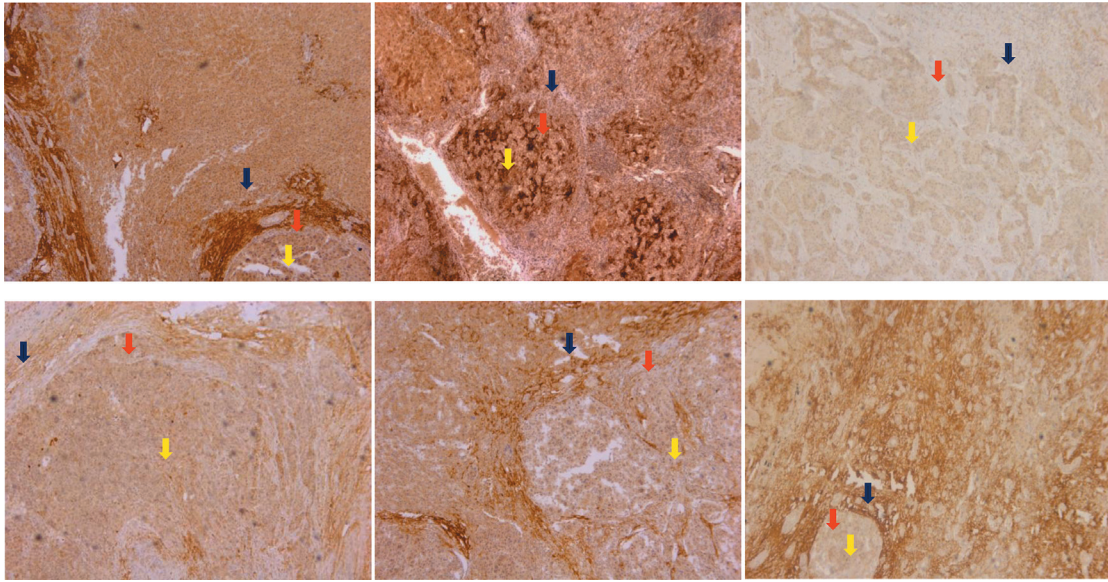

**Supplementary Figure S3: CXCL1 protein expression in different areas of the tumor.** Yellow arrow: center of the tumor, red arrow: the invasive front of the tumor, blue arrow: the stroma tissues around the tumor. Original magnification was 50 $\times$ .

**Supplementary Table S1: Associations between CXCL1 expression and clinicopathologic variables of HCC patients *n* (%)**

| Clinical characters                      | CXCL1                   |                 |                | <i>P</i> -value |
|------------------------------------------|-------------------------|-----------------|----------------|-----------------|
|                                          | All case <i>n</i> = 119 | High expression | Low expression |                 |
| Gender(Female/Male)                      |                         |                 |                |                 |
| Female                                   | 19                      | 13 (16.9)       | 6 (14.3)       | 0.712           |
| Male                                     | 100                     | 64 (83.1)       | 36 (85.7)      |                 |
| Age ( $\geq 60$ / $< 60$ )               |                         |                 |                |                 |
| $\geq 60$                                | 69                      | 49 (63.6)       | 20 (47.6)      | 0.091           |
| $< 60$                                   | 50                      | 28 (36.4)       | 22 (52.4)      |                 |
| Cirrhosis                                |                         |                 |                |                 |
| No                                       | 18                      | 9 (11.7)        | 9 (21.4)       | 0.156           |
| Yes                                      | 101                     | 68 (88.3)       | 33 (78.6)      |                 |
| AFP ( $\geq 400$ / $< 400$ )             |                         |                 |                |                 |
| $\geq 400$ ng/mL                         | 35                      | 28 (36.4)       | 7 (16.7)       | 0.024           |
| $< 400$ ng/mL                            | 84                      | 49 (63.6)       | 35 (83.3)      |                 |
| HBV-DNA (Positive/Negative)              |                         |                 |                |                 |
| Positive                                 | 54                      | 35 (45.5)       | 19 (45.2)      | 0.982           |
| Negative                                 | 65                      | 42 (54.5)       | 23 (54.8)      |                 |
| Microvascular invasion (Yes/No)          |                         |                 |                |                 |
| Yes                                      | 32                      | 23 (29.9)       | 9 (21.4)       | 0.321           |
| No                                       | 87                      | 54 (70.1)       | 33 (78.6)      |                 |
| Macrovascular invasion (Yes/No)          |                         |                 |                |                 |
| Yes                                      | 5                       | 5 (6.5)         | 0 (0.0)        | 0.160*          |
| No                                       | 114                     | 72 (93.5)       | 42 (100.0)     |                 |
| TNM stage (I/II/III)                     |                         |                 |                |                 |
| I                                        | 67                      | 38 (49.4)       | 29 (69.0)      | 0.099           |
| II                                       | 28                      | 20 (26.0)       | 8 (19.0)       |                 |
| III                                      | 24                      | 19 (24.7)       | 5 (11.9)       |                 |
| Differentiation (Poorly/Moderately-Well) |                         |                 |                |                 |
| Poorly                                   | 27                      | 25 (32.5)       | 2 (4.8)        | 0.001           |
| Moderately-Well                          | 92                      | 52 (67.5)       | 40 (95.2)      |                 |
| Tumor number (Single/Multiple)           |                         |                 |                |                 |
| Single                                   | 90                      | 56 (72.7)       | 34 (81.0)      | 0.318           |
| Multiple                                 | 29                      | 21 (27.3)       | 8 (19.0)       |                 |
| Encapsulation (Invasion/Non-invasion)    |                         |                 |                |                 |
| Invasion                                 | 43                      | 5 (6.5)         | 38 (90.5)      | 0.719*          |
| Non-invasion                             | 76                      | 72 (93.5)       | 4 (9.5)        |                 |
| Tumor size ( $\geq 5$ cm/ $< 5$ cm)      |                         |                 |                |                 |
| $\geq 5$ cm                              | 54                      | 36 (46.8)       | 18 (42.9)      | 0.683           |
| $< 5$ cm                                 | 65                      | 41 (53.2)       | 24 (57.1)      |                 |
| Child-Pugh classification (A/B)          |                         |                 |                |                 |
| A                                        | 108                     | 69 (68.9)       | 39 (92.9)      | 0.745*          |
| B                                        | 11                      | 8 (10.4)        | 3 (7.1)        |                 |
| BCLC classification (A/B–C)              |                         |                 |                |                 |
| A                                        | 86                      | 53 (68.8)       | 33 (78.6)      | 0.257           |
| B–C                                      | 33                      | 24 (31.2)       | 9 (21.4)       |                 |

\*Fisher exact test.

**Supplementary Table S2: Clinicopathological factors for prognosis by Univariate and Cox-multivariate regression analysis**

| Clinical demographic      |                            | Univariate analysis |          | Cox-multivariate analysis |          | Univariate analysis |          | Cox-multivariate analysis |          |
|---------------------------|----------------------------|---------------------|----------|---------------------------|----------|---------------------|----------|---------------------------|----------|
|                           |                            | 3-year OS rate      | <i>P</i> | HR (95% CI)               | <i>P</i> | 3-years DFS rate    | <i>P</i> | HR (95% CI)               | <i>P</i> |
| Gender                    | Femal/Male                 | 56.8/74.6           | 0.093    |                           |          | 30.7/41.6           | 0.085    |                           |          |
| Age                       | ≥ 60/< 60                  | 69.6/74.5           | 0.429    |                           |          | 47.1/53.7           | 0.262    |                           |          |
| Cirrhosis                 | Yes/No                     | 77.0/64.2           | 0.474    |                           |          | 42.2/28.4           | 0.076    |                           |          |
| AFP                       | ≥ 400/< 400                | 58.0/77.3           | 0.036    | 2.159 (1.040–4.482)       | 0.039    | 60.0/22.2           | 0.003    | 1.860 (1.091–3.111)       | 0.023    |
| HBV-DNA                   | Positive/Negative          | 72.0/71.3           | 0.960    |                           |          | 42.8/37.4           | 0.492    |                           |          |
| Microvascular invasion    | Yes/No                     | 45.0/80.8           | 0.001    | 1.865 (0.761–4.574)       | 0.173    | 28.1/43.8           | 0.024    | 1.722 (0.877–3.381)       | 0.114    |
| Macrovascular invasion    | Yes/No                     | 20.0/74.2           | 0.001    | 0.677 (0.113–4.070)       | 0.670    | 0.0/41.5            | 0.001    | 1.924 (0.642–5.760)       | 0.242    |
| TNM stage                 | I/II/III                   | 81.3/65.3/44.4      | < 0.001  | 2.473 (0.410–14.928)      | 0.324    | 48.7/33.4/19.5      | 0.004    | 3.564 (1.008–12.597)      | 0.049    |
|                           |                            |                     |          | 0.928 (0.273–3.154)       | 0.905    |                     |          | 2.497 (1.011–6.164)       | 0.047    |
| Differentiation           | Poorly/Moderately and Well | 58.3/75.6           | 0.024    | 0.784 (0.352–1.747)       | 0.551    | 18.5/46.4           | 0.003    | 0.848 (0.460–1.562)       | 0.596    |
| Tumor number              | Single/Multiple            | 75.9/58.6           | 0.047    | 0.447 (0.105–1.901)       | 0.276    | 42.8/30.2           | 0.152    |                           |          |
| Encapsulation             | Invasion/ non-invasion     | 55.6/78.0           | 0.229    |                           |          | 38.1/39.8           | 0.896    |                           |          |
| Tumor size                | ≥ 5 cm/< 5 cm              | 69.1/73.8           | 0.308    |                           |          | 27.3/48.4           | 0.367    |                           |          |
| Child-Pugh classification | A/B                        | 80.3/36.4           | < 0.001  | 6.905 (2.583–18.458)      | < 0.001  | 41.2/30.3           | 0.222    |                           |          |
| BCLC classification       | A/B - C                    | 82.7/43.2           | < 0.001  | 14.346 (2.985–68.954)     | 0.001    | 47.9/17.1           | < 0.001  | 4.286 (1.714–10.719)      | 0.002    |
| CXCL1 expression          | Low/High                   | 81.4/66.5           | 0.050    | 1.779 (0.779–4.063)       | 0.172    | 57.8/30.4           | 0.001    | 2.139 (1.221–3.746)       | 0.008    |

**Supplementary Table S3: Oligonucleotide primers for genes were used in this research**

| Gene                              | oligonucleotide primers                                                                                                                                                                                                                                                                                                                                                          |
|-----------------------------------|----------------------------------------------------------------------------------------------------------------------------------------------------------------------------------------------------------------------------------------------------------------------------------------------------------------------------------------------------------------------------------|
| CXCL1                             | F-5'TGCTGAACAGTGACAAATCCAAC3'<br>R-5'TGGGGTTGACATTTCAAAAAGAA3'                                                                                                                                                                                                                                                                                                                   |
| Small heparin RNA for CXCL1       | Top strand 5'-GATCCGAATGGGCGGAAAGCTTGCCTCAATTCAAGAGAA<br>TTGAGGCAAGCTTTCCGCCATTCTTTTTTG-3',<br>Bottom strand 5'-AATTCAAAAAGAATGGGCGGAAAGCTTGCCTCAATT<br>CTCTTGAAATTGAGGCAAGCTTTCCGCCATTTCG-3'.                                                                                                                                                                                   |
| For Lv-CXCL1, insert DNA sequence | 5'-ATGGCCCGCGCTGCTCTCTCCGCCGCCCCA GCAATCCCCGGCTC<br>CTGCGAGTGGCACTGC TGCTCCTGCTCCTGGTAGCCGCTGGCCGGCG<br>CGCAGCAGGAGCGTCCGTGGCCACTGAAC TGCCTGCCAGTGCTTG<br>CAGACCCTGCAGG<br>GAATTCACCCCAAGAACATCCAAAGTGTGA ACGTGAAGTCCCCCGGA<br>CCCCACTGCGCCC<br>AAACCGAAGTCATAGCCCACTCAAGAATG GGCGGAAAGCTTGCCTC<br>AATCCTGCATCCCC<br>CATAGTTAAGAAAATCATCGAAAAGATGC<br>TGAACAGTGACAAATCCAAGTGA-3' |
| microRNA-200a probe               | 5'-ACATCGTTACCAGACAGAGTTA-3'                                                                                                                                                                                                                                                                                                                                                     |
| U6 probe                          | 5'-GCAGGGGCCATGCTAATCTTCTCTGTATCG-3'                                                                                                                                                                                                                                                                                                                                             |
| MiR-200a                          | GSP:5'GGGTTTTAACTGTCTGGTA3'<br>R:5'CAGTGCGTGTCTGGA3'                                                                                                                                                                                                                                                                                                                             |
| GAPDH                             | F 5'-TGACTTCAACAGCGACACCCA-3'<br>R 5'-CACCTGTTGCTGTAGCCAAA-3'                                                                                                                                                                                                                                                                                                                    |
| <i>E-cadherin</i>                 | F 5'-CTTTGACGCCGAGAGCTACA-3'<br>R 5'- TTTGAATCGGGTGTCTGAGGG-3'                                                                                                                                                                                                                                                                                                                   |
| <i>Vimentin</i>                   | F 5'-GGACCAGCTAACCAACGACA-3'<br>R 5'-AAGGTCAAGACGTGCCAGAG-3'                                                                                                                                                                                                                                                                                                                     |
| <i>N-cadherin</i>                 | F 5'-CGCTATTTGTCATCAGCTCGC-3'<br>R 5'- TGCGATTTACCAGAAGCCT-3'                                                                                                                                                                                                                                                                                                                    |
| <i>Fibronectin</i>                | F 5'- ACAAGCATGTCTCTTGCCA-3'<br>R 5'- TTTGCATCTTGGTTGGCTGC-3'                                                                                                                                                                                                                                                                                                                    |
| <i>Snail</i>                      | F 5'-GAGGACAGTGGGAAAGGCTC-3'<br>R 5'- TGGCTTCGGATGTGCATCTT-3'                                                                                                                                                                                                                                                                                                                    |
